# Supplementary figures and images for: Smart material concept: reversible microstructural self-regeneration for catalytic applications
Source: Royal Society of Chemistry journal article supplement (doi:10.1039/c6ta03417a), 2016-01-01

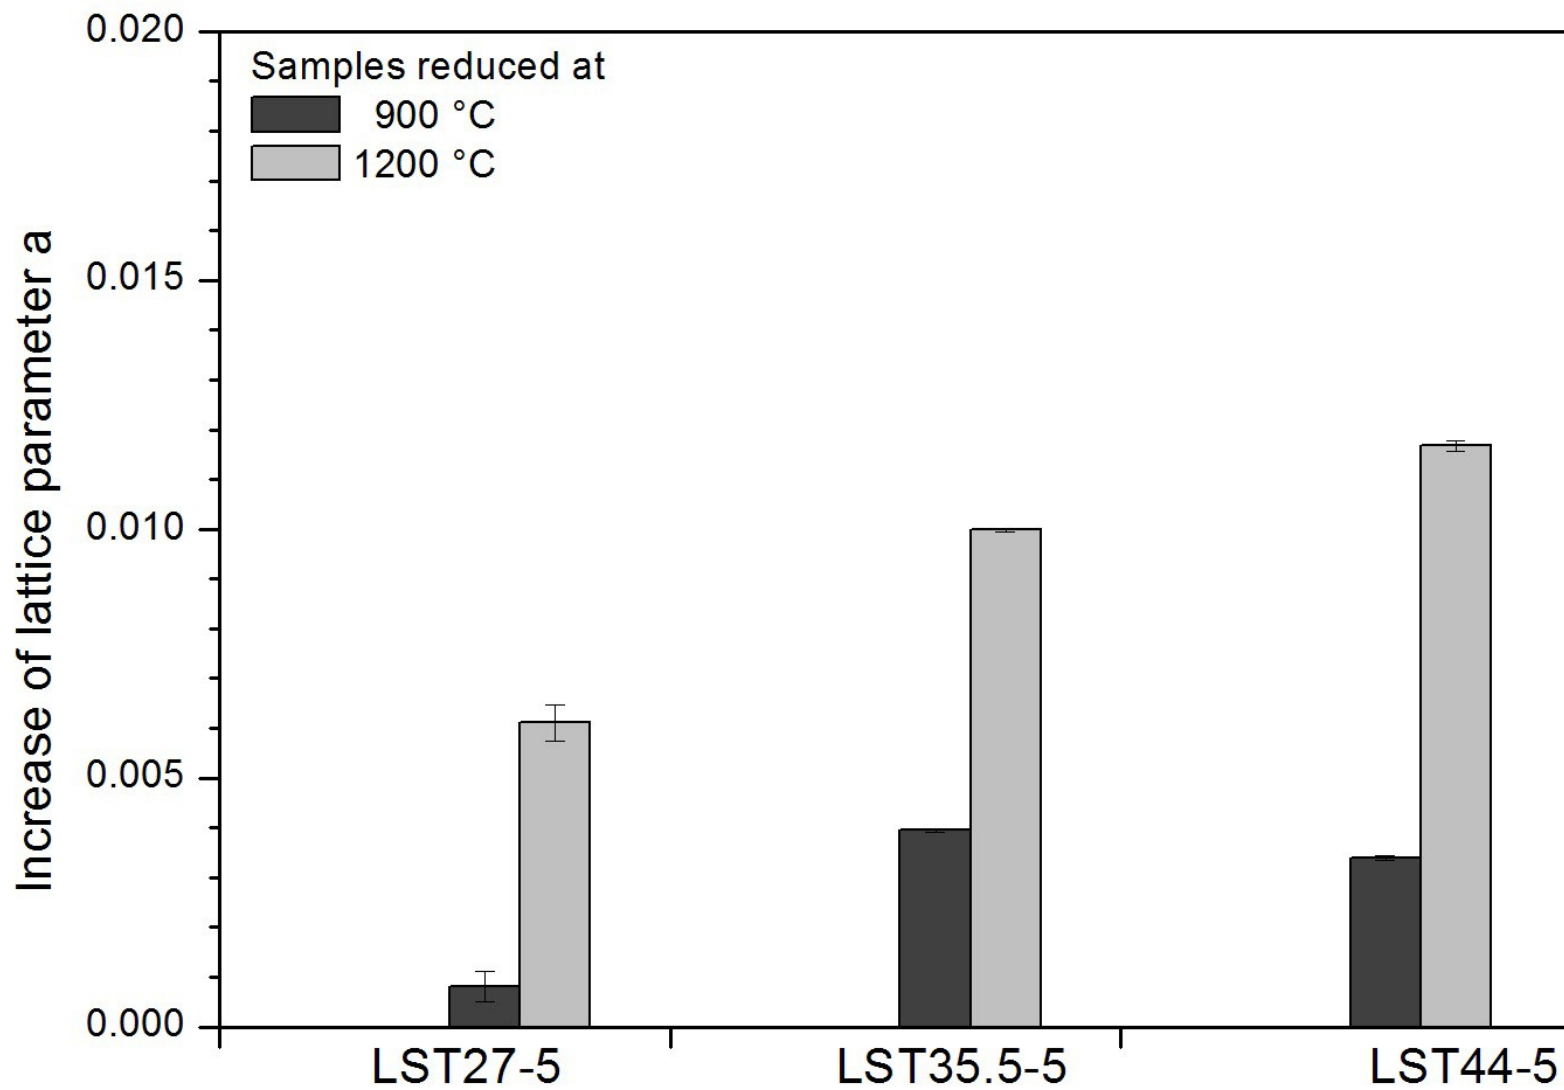

Supplement: c6ta03417a1.pdf [file c6ta03417a1.pdf]
